# Supplementary material for: The Anti-Serotonin Effect of Parthenolide Derivatives and Standardised Extract from the Leaves of Stizolophus balsamita
Source: PubMed Central journal article supplement (PMC6891796; doi:10.3390/molecules24224131), 2019-11-15
Supplement: molecules-24-04131-s001.pdf [file molecules-24-04131-s001.pdf]

# Supplementary Files

The anti-serotonin effect of parthenolide derivatives and standardised extract from the leaves of *Stizolophus balsamita*

Joanna Nawrot<sup>1</sup>, Marta Napierała<sup>2</sup>, Kinga Kaczerowska-Pietrzak<sup>1</sup>, Ewa Florek<sup>2</sup>, Justyna Gornowicz-Porowska<sup>1</sup>, Ewa Pelant<sup>1</sup> and Gerard Nowak<sup>1,\*</sup>

<sup>1</sup>Department of Medicinal and Cosmetic Natural Products, Poznan University of Medicinal Sciences, Poznan, Poland

<sup>2</sup>Laboratory of Environmental Research, Department of Toxicology, Poznan University of Medicinal Sciences, Poznan, Poland

Correspondence: gnowak@ump.edu.pl Phone, Fax: 48 61 8470628

Figure S1. TLC of the purified CH<sub>2</sub>Cl<sub>2</sub> extract and germacranolides isolated from the *Stizolophus balsamita* leaves.

Figure S2. HPLC chromatograms of stizolin (S), izospiciformin (I) and stizolicin (Sc)

Figure S3. Concentrations of serotonin (mg/mL) in the stizolin sample and the control sample.

Figure S4. Concentrations of serotonin (mg/mL) in the izospiciformin sample and the control sample.

Figure S5. Concentration of serotonin (mg/mL) in the stizolicin sample and the control sample.

Figure S6. Concentrations of serotonin (mg/mL) in the methanol extract from the leaves of *S. balsamita* sample and the control sample.

Table S1. <sup>1</sup>H NMR (600 MHz) spectroscopic data of compounds 2, 3 and 7.

Table S2. <sup>13</sup>C NMR (150 MHz) spectroscopic data of compounds 2, 3 and 7.

**Figure 1.** TLC of the purified  $\text{CH}_2\text{Cl}_2$  extract and germacranolides isolated from the *Stizolophus balsamita* leaves. Adsorbent: silica gel; mobile phase: n-hexane –  $(\text{CH}_3)_2\text{CO}$  2:1; 1—balsamin; 2—izospiciformin; 3—stizolin 4—9a-hydroxyparthenolide; 5—8 $\alpha$ -E-(4'-hydroxy)-seneciyoxyloxy-9 $\alpha$ -hydroxyparthenolide; 6—11 $\beta$ ,13-dihydrostizolicin; 7—stizolicin; 8—purified  $\text{CH}_2\text{Cl}_2$  extract of *S. balsamita* leaves.

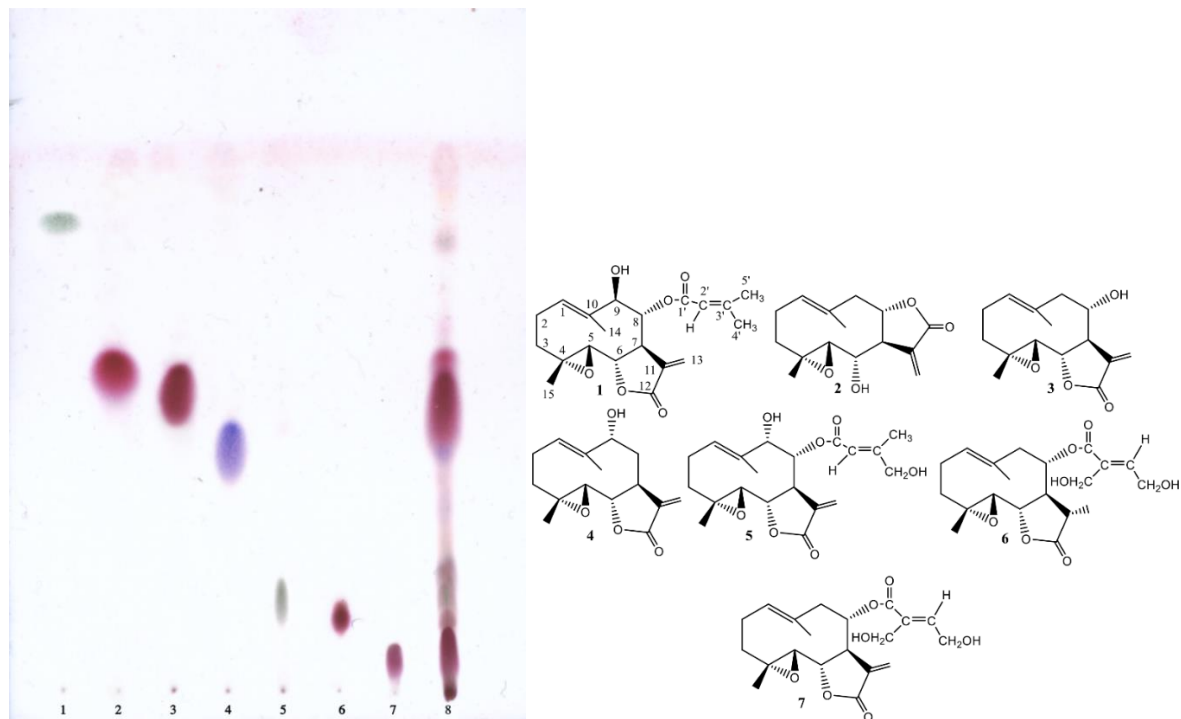

The purple color of the spots of 4,5-epoxygermacranolides indicates the presence of an OH group at C-6 and a substituent at C-8 or the substituent only at C-8 (compounds 2, 3, 6 and 7). The violet color of the spot indicates the presence of a hydroxyl group at C-9 and the absence of this group at C-8 (compound 4). Finally, the green color of the spot of parthenolide derivatives shows the presence of two substituents.

**Figure 2.** The HPLC chromatograms of stizolin (S), izospiciformin (I) and stizolicin (Sc).

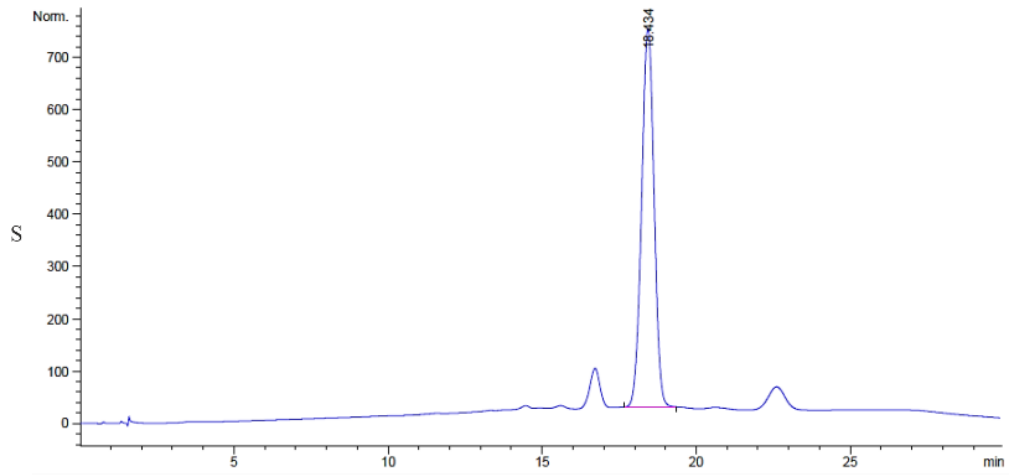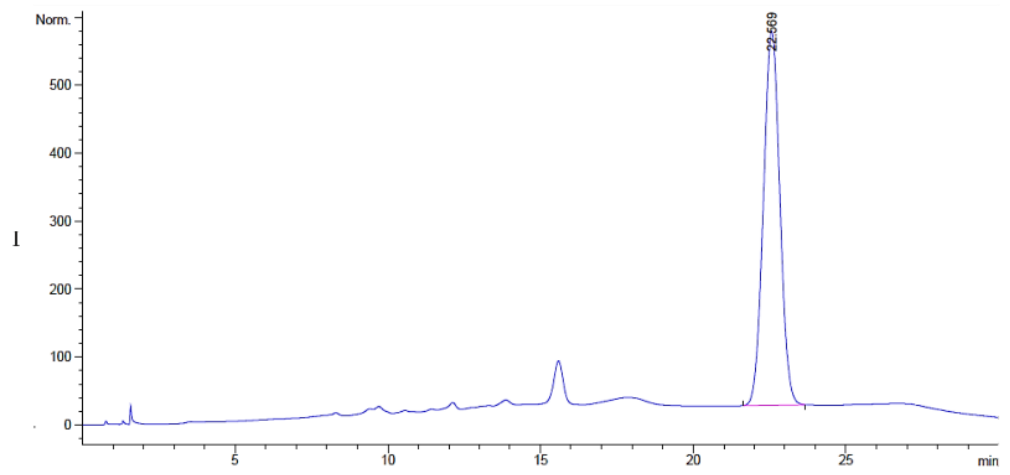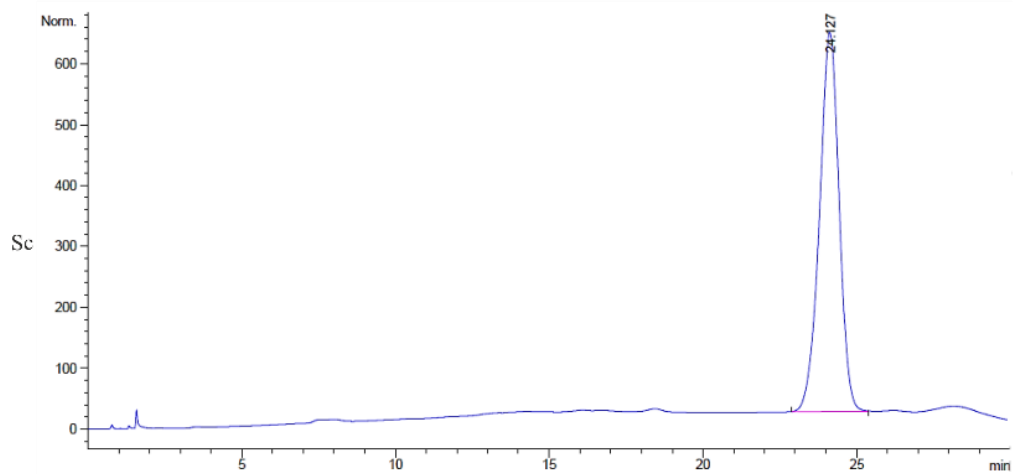

**Figure 3.** Concentrations of serotonin (mg/mL) in the stizolin sample and the control sample.

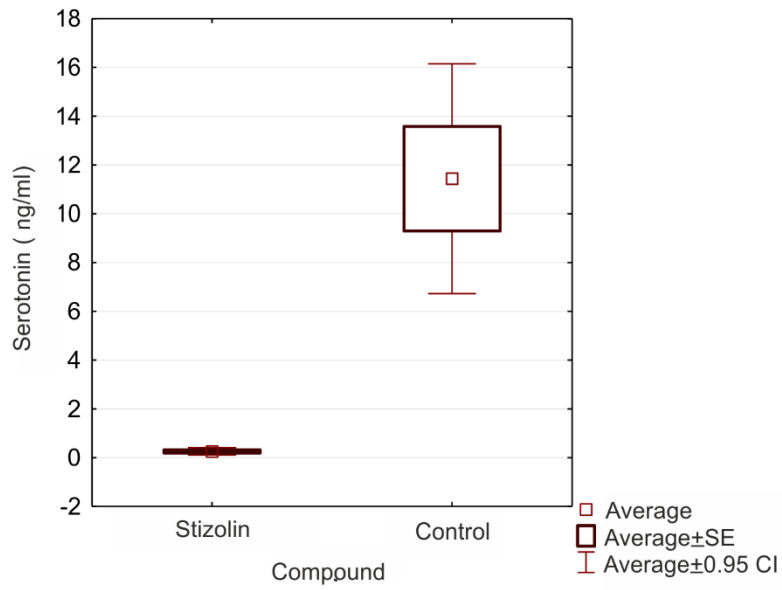

**Figure 4.** Concentrations of serotonin (mg/mL) in the isospiciformin sample and the control sample.

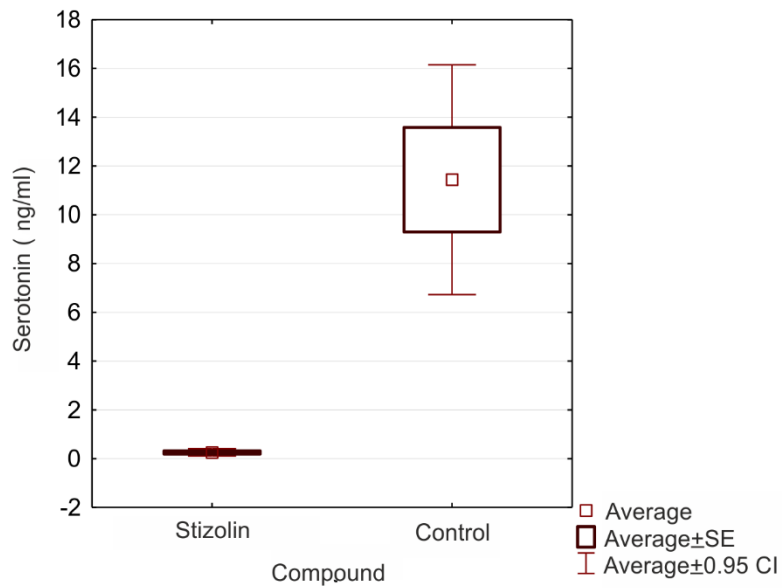

**Figure 5.** Concentrations of serotonin (mg/mL) in the stizolicin sample and the control sample. .

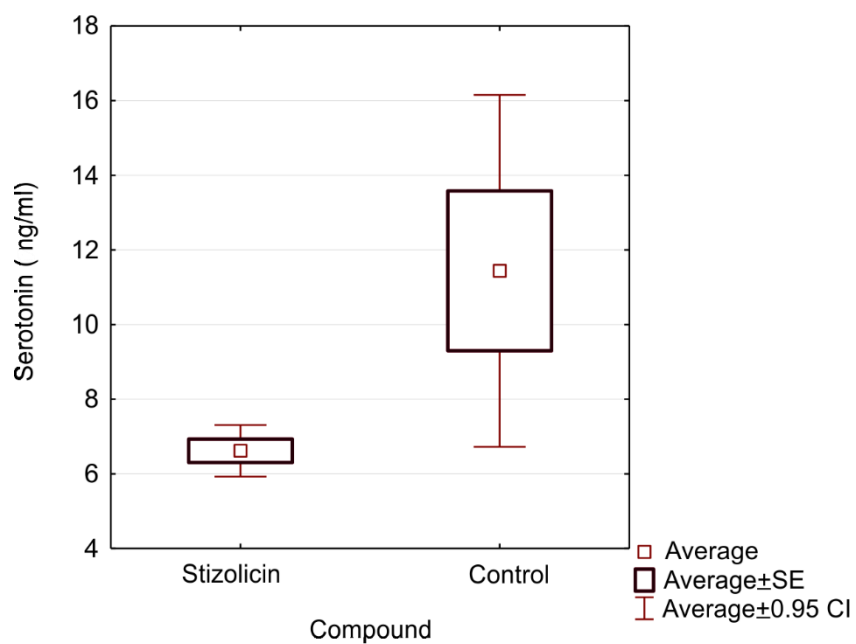

**Figure 6.** Concentrations of serotonin (mg/mL) in the methanol extract from the leaves of *S. balsamita* sample and the control sample.

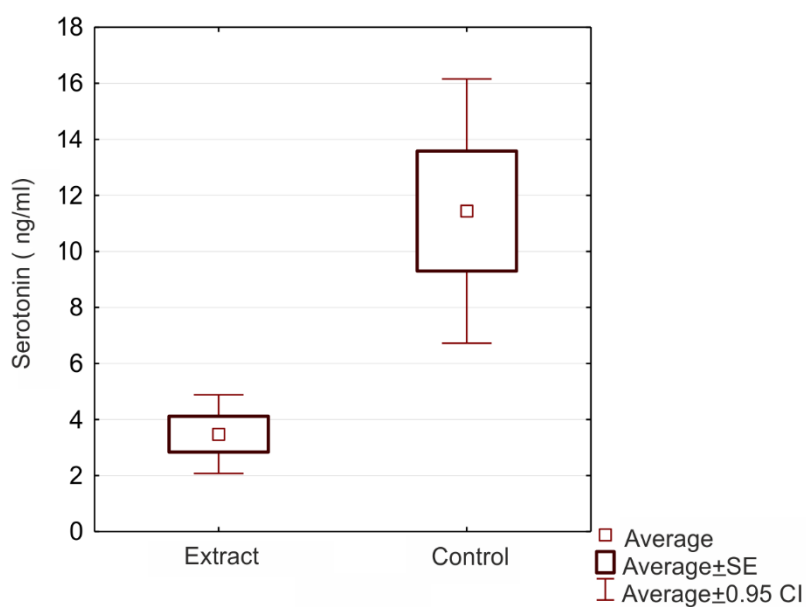

**Table 1.**  $^1\text{H}$  NMR (600 MHz) spectroscopic data ( $\delta\text{H}$  in ppm, mult;  $J$  in Hz) of: izospiciformin (2), stizolin (3), and stizolicin (7).

| Pos. | 2 <sup>a</sup>     | 3 <sup>a</sup> | 7 <sup>b</sup>      |
|------|--------------------|----------------|---------------------|
| 1    | 5.36 bs            | 5.25 bd (12.1) | 5.45 bd (10.5)      |
| 2a   | 1.21 m             | 2.43 m         | 2.52 dd (5.8; 13.5) |
| 2b   | 0.98 m             | 2.23 m         | 2.25 bd (13.6)      |
| 3a   | 2.13 m             | 2.15 m         | 2.13 dd (12.9; 6.0) |
| 3b   | 1.34 m             | 1.24 m         | 1.29 m              |
| 5    | 2.66 d (8.9)       | 2.73 d (8.1)   | 2.85 d (9.3)        |
| 6    | 3.44 dd (8.9; 9.6) | 3.98 bt (7.4)  | 4.37 t (9.3)        |
| 7    | 3.00 m             | 3.09 m         | 3.59 m              |
| 8a   | 4.01 m             | -              | 4.57 bdd (3.9; 2.7) |
| 8b   | -                  | 3.88 m         | -                   |

|     |                    |                |                      |
|-----|--------------------|----------------|----------------------|
| 9a  | 2.84 m             | 2.57b d (12.5) | 2.70 dd (11.8; 11.6) |
| 9b  | 2.14 m             | 2.43 d (12.2)  | 2.47 bd (12.1)       |
| 13a | 6.46 dd (1.2; 3.0) | 6.50 d (3.1)   | 5.80 d (3.0)         |
| 13b | 6.28 dd (1.2; 2.6) | 6.16 d (2.4)   | 6.20 d (3.4)         |
| 14  | 1.79 s             | 1.76 s         | 1.82 bs              |
| 15  | 1.28 s             | 1.28s          | 1.28 bs              |
| 3'  | -                  | -              | 6.94 t (5.9)         |
| 4'  | -                  | -              | 4.40 d (5.9)         |
| 5'  | -                  | -              | 4.28 s               |

<sup>a</sup> in CDCl<sub>3</sub>; <sup>b</sup> in CD<sub>3</sub>OD; <sup>c</sup> overlapped signals.

**Table 2.** <sup>13</sup>C NMR (150 MHz) spectroscopic.

| data of compounds <b>2</b> , <b>3</b> and <b>7</b> |                      |                      |                      |
|----------------------------------------------------|----------------------|----------------------|----------------------|
| <b>C</b>                                           | <b>2<sup>a</sup></b> | <b>3<sup>a</sup></b> | <b>7<sup>b</sup></b> |
| 1                                                  | 126.86               | 128.26               | 128.59               |
| 2                                                  | 14.17                | 24.71                | 25.30                |
| 3                                                  | 36.18                | 35.65                | 37.00                |
| 4                                                  | 64.09                | 61.45                | 62.57                |
| 5                                                  | 69.69                | 66.33                | 67.63                |
| 6                                                  | 71.06                | 78.00                | 82.25                |
| 7                                                  | 49.06                | 52.21                | 50.48                |
| 8                                                  | 80.35                | 71.35                | 75.07                |
| 9                                                  | 44.45                | 52.00                | 47.84                |
| 10                                                 | 134.02               | 129.78               | 132.65               |
| 11                                                 | 169.51               | 134.03               | 131.06               |
| 12                                                 | 171.15               | 169.49               | 171.57               |
| 13                                                 | 128.94               | 128.55               | 126.19               |
| 14                                                 | 18.86                | 18.13                | 18.40                |
| 15                                                 | 17.53                | 17.40                | 17.65                |
| 1'                                                 | -                    | -                    | 167.92               |
| 2'                                                 | -                    | -                    | 135.28               |
| 3'                                                 | -                    | -                    | 147.02               |
| 4'                                                 | -                    | -                    | 59.45                |
| 5'                                                 | -                    | -                    | 56.78                |

<sup>a</sup> in CDCl<sub>3</sub>; <sup>b</sup> in CD<sub>3</sub>OD.
